# Supplementary material
Source: Elsevier journal article supplement (https://comptes-rendus.academie-sciences.fr/geoscience/article/10.1016/j.crte.2011.02.002/file/attach/mmc1.pdf)
Supplement: mmc1 [file mmc1.pdf]

**Annexe A.**

Tab. A.1: GPS Height rate and 1-sigma uncertainties estimates, relative to the ITRF2005 reference frame. Selected stations span more than five years with no discontinuities in their time series. HPT denotes the Helmert's Parameter Transformation (14-HPT : three translations, three rotations, and scale factor and their rates of change). 14-HPT and 07-HPT height rates are derived, respectively, from the GLOBK weekly combined solutions and the linear trend of the GLOBK daily height time series over the whole period (1998-2009).

Tableau A.1. Déplacements verticaux GPS et incertitudes suivant le repère de référence ITRF2005. Les séries temporelles des stations sont sélectionnées en fonction du critère de continuité, sur une période de cinq ans au moins. HPT sont les paramètres de transformation de Helmert (14-HPT : trois translations, trois rotations, un facteur d'échelle et leurs vitesses associées). 14-HPT et 07-HPT résultent, respectivement, de la combinaison des solutions hebdomadaires de GLOBK, et de la tendance linéaire des solutions journalières de GLOBK, pour la période entière de 1998 à 2009.

| Lon<br>(°E) | Lat<br>(°N) | 14-HPT Hgt Rate<br>(mm/yr) | 07-HPT Hgt Rate<br>(mm/yr) | 1-σ Unc.<br>(mm/yr) | Data Span<br>(yrs) | Start Epoch | End Epoch | Site |
|-------------|-------------|----------------------------|----------------------------|---------------------|--------------------|-------------|-----------|------|
| 359.519     | 38.339      | 0.83                       | 0.70                       | 0.45                | 6.61               | 1999.60     | 2006.21   | ALAC |
| 358.716     | 51.454      | 0.56                       | 0.67                       | 0.47                | 6.36               | 2001.95     | 2008.32   | S041 |
| 358.315     | 55.213      | 1.29                       | 1.61                       | 0.61                | 11.75              | 1998.03     | 2009.77   | MORP |
| 357.158     | -71.674     | 1.15                       | 1.57                       | 0.65                | 11.08              | 1998.62     | 2009.70   | VESL |
| 356.911     | 40.525      | 1.02                       | 1.41                       | 0.41                | 9.03               | 2000.75     | 2009.77   | YEBE |
| 356.048     | 40.444      | -0.60                      | -0.71                      | 0.44                | 11.75              | 1998.03     | 2009.77   | VILL |
| 355.750     | 40.429      | 1.15                       | 1.25                       | 0.60                | 9.28               | 2000.50     | 2009.77   | MADR |
| 354.892     | 33.540      | 1.39                       | 1.42                       | 0.41                | 7.19               | 2001.57     | 2008.76   | IFRN |
| 354.637     | 35.562      | 2.46                       | 2.76                       | 0.66                | 6.57               | 2002.80     | 2009.37   | TETN |
| 353.794     | 36.464      | 1.55                       | 1.71                       | 0.62                | 6.32               | 2003.45     | 2009.77   | SFER |
| 353.146     | 33.998      | -0.78                      | -0.56                      | 0.46                | 9.39               | 2000.38     | 2009.77   | RABT |
| 351.601     | 43.364      | -2.44                      | -2.37                      | 0.50                | 9.31               | 2000.46     | 2009.77   | ACOR |
| 350.581     | 38.693      | 0.39                       | 0.46                       | 0.36                | 10.02              | 1999.75     | 2009.77   | CASC |
| 350.119     | -40.349     | 0.45                       | -0.56                      | 0.72                | 8.36               | 1998.62     | 2006.98   | GOUG |
| 344.802     | 64.267      | 12.10                      | 12.37                      | 0.64                | 8.03               | 2001.74     | 2009.77   | HOFN |
| 344.367     | 27.764      | -0.48                      | -0.26                      | 0.32                | 11.75              | 1998.03     | 2009.77   | MAS1 |
| 338.045     | 64.139      | -0.92                      | -1.24                      | 0.75                | 9.29               | 2000.48     | 2009.77   | REYK |
| 334.337     | 37.748      | -0.70                      | -0.68                      | 0.44                | 9.47               | 2000.31     | 2009.77   | PDEL |
| 321.574     | -3.877      | 2.51                       | 2.20                       | 0.82                | 6.04               | 2000.23     | 2006.27   | FORT |
| 315.015     | -22.687     | 1.04                       | 0.88                       | 0.65                | 8.47               | 2001.30     | 2009.77   | CHPI |
| 313.952     | 60.715      | 2.59                       | 3.67                       | 0.64                | 5.77               | 2004.01     | 2009.77   | QAQ1 |
| 312.122     | -15.947     | -0.22                      | -0.36                      | 0.51                | 11.73              | 1998.05     | 2009.77   | BRAZ |
| 310.769     | -25.448     | 1.78                       | 1.68                       | 0.46                | 9.33               | 1998.03     | 2007.36   | PARA |
| 309.055     | 66.987      | 1.82                       | 2.44                       | 0.59                | 8.07               | 2001.71     | 2009.77   | KELY |
| 308.591     | -22.120     | 2.04                       | 2.26                       | 0.62                | 7.88               | 1998.03     | 2005.90   | UEPP |
| 307.322     | 47.595      | 0.29                       | 0.33                       | 0.31                | 11.75              | 1998.03     | 2009.77   | STJO |
| 307.194     | 5.252       | 0.01                       | 0.44                       | 0.75                | 11.75              | 1998.03     | 2009.77   | KOUR |
| 302.099     | -63.321     | 5.77                       | 6.60                       | 0.73                | 7.65               | 2002.13     | 2009.77   | OH12 |
| 302.099     | -63.321     | 4.37                       | 5.16                       | 0.63                | 6.67               | 2003.11     | 2009.77   | OH13 |
| 302.068     | -34.907     | 3.38                       | 3.16                       | 0.45                | 11.75              | 1998.03     | 2009.77   | LPGS |
| 301.481     | -34.574     | 2.01                       | 2.63                       | 0.73                | 8.03               | 2000.35     | 2008.38   | S031 |
| 301.019     | -62.194     | -3.23                      | -3.74                      | 0.63                | 6.38               | 1998.03     | 2004.41   | FREI |
| 297.731     | -38.701     | 2.43                       | 2.32                       | 0.83                | 6.69               | 2000.33     | 2007.02   | VBCA |
| 297.660     | 82.494      | 6.18                       | 5.92                       | 0.67                | 6.65               | 2002.91     | 2009.56   | ALRT |
| 296.389     | 44.684      | -0.42                      | -0.55                      | 0.48                | 6.80               | 2002.97     | 2009.77   | HLFX |
| 295.949     | -64.775     | 5.39                       | 5.90                       | 1.00                | 11.25              | 1998.52     | 2009.77   | PALM |
| 295.530     | -31.528     | 0.24                       | 0.76                       | 0.82                | 6.76               | 1999.58     | 2006.34   | CORD |
| 295.416     | 17.757      | -1.23                      | -1.27                      | 0.47                | 11.75              | 1998.03     | 2009.77   | CRO1 |
| 295.304     | 32.370      | -1.62                      | -1.63                      | 0.59                | 5.10               | 1998.03     | 2003.12   | BRMU |
| 295.304     | 32.370      | -0.71                      | -0.54                      | 0.52                | 6.40               | 2003.20     | 2009.60   | BRMU |
| 294.592     | -24.727     | 0.09                       | -0.29                      | 0.50                | 9.77               | 2000.00     | 2009.77   | UNSA |
| 294.405     | -38.003     | 0.99                       | 0.90                       | 0.57                | 10.41              | 1998.03     | 2008.43   | LHCL |
| 293.167     | 54.832      | 10.70                      | 10.88                      | 0.46                | 11.75              | 1998.03     | 2009.77   | SCH2 |
| 292.933     | 18.463      | -0.27                      | 0.40                       | 0.50                | 8.99               | 1998.03     | 2007.02   | PUR3 |
| 292.249     | -53.785     | 3.11                       | 3.11                       | 0.58                | 7.99               | 1999.18     | 2007.17   | RIOG |
| 291.767     | -31.602     | 0.13                       | 0.06                       | 0.42                | 11.59              | 1998.03     | 2009.62   | CFAG |
| 291.696     | -54.840     | 2.00                       | 2.15                       | 0.58                | 9.77               | 1999.00     | 2008.78   | AUTF |
| 291.175     | 76.537      | 6.06                       | 6.32                       | 0.70                | 7.38               | 2002.40     | 2009.77   | THU3 |
| 291.175     | 76.537      | 5.58                       | 5.54                       | 0.52                | 10.90              | 1998.87     | 2009.77   | THU2 |
| 289.120     | -53.137     | -0.39                      | -0.38                      | 0.44                | 10.46              | 1999.00     | 2009.47   | PARC |
| 288.507     | 42.613      | 0.04                       | 0.24                       | 0.68                | 5.65               | 2004.12     | 2009.77   | WES2 |
| 288.108     | -45.514     | -0.55                      | -0.31                      | 0.60                | 8.78               | 1999.04     | 2007.82   | COYQ |
| 284.238     | 20.012      | 0.41                       | 0.29                       | 0.49                | 9.75               | 2000.02     | 2009.77   | SCUB |
| 283.219     | 17.939      | -1.00                      | -1.00                      | 0.68                | 7.28               | 1999.73     | 2007.02   | JAMA |
| 283.173     | 39.022      | -1.52                      | -0.94                      | 0.45                | 11.59              | 1998.18     | 2009.77   | GODE |
| 281.929     | 45.956      | 3.84                       | 3.73                       | 0.33                | 11.59              | 1998.18     | 2009.77   | ALGO |
| 281.506     | -0.215      | 0.30                       | 0.94                       | 0.64                | 8.57               | 2000.00     | 2008.57   | S061 |
| 279.838     | 25.735      | 0.57                       | 0.21                       | 0.64                | 5.46               | 1998.03     | 2003.49   | AOML |
| 279.455     | 28.460      | -2.64                      | -2.36                      | 0.63                | 8.41               | 1998.60     | 2007.02   | CCV3 |
| 278.347     | 24.582      | -0.45                      | 0.19                       | 0.55                | 7.01               | 2000.00     | 2007.02   | KYW1 |
| 277.468     | 27.850      | -0.87                      | -0.11                      | 0.57                | 5.65               | 2001.36     | 2007.02   | MCD1 |
| 270.132     | 16.916      | 1.82                       | 2.56                       | 0.74                | 6.90               | 2001.94     | 2008.83   | ELEN |

Tab. A.1 : — Continued from previous page

| Lon<br>(°E) | Lat<br>(°N) | 14-HPT Hgt Rate<br>(mm/yr) | 07-HPT Hgt Rate<br>(mm/yr) | 1- $\sigma$ Unc.<br>(mm/yr) | Data Span<br>(yrs) | Start Epoch | End Epoch | Site |
|-------------|-------------|----------------------------|----------------------------|-----------------------------|--------------------|-------------|-----------|------|
| 270.058     | 29.879      | -2.02                      | -1.80                      | 0.61                        | 8.99               | 1998.03     | 2007.02   | ENGI |
| 269.838     | 51.480      | 3.64                       | 3.60                       | 1.00                        | 6.19               | 2003.18     | 2009.37   | PICL |
| 269.696     | -0.743      | -1.82                      | -0.93                      | 0.65                        | 6.75               | 2003.03     | 2009.77   | GLPS |
| 269.480     | 14.590      | 0.92                       | 0.73                       | 0.72                        | 9.20               | 2000.58     | 2009.77   | GUAT |
| 265.911     | 58.759      | 9.10                       | 10.46                      | 0.74                        | 5.04               | 2000.00     | 2005.04   | CHUR |
| 265.263     | 29.330      | -4.32                      | -4.65                      | 0.63                        | 5.50               | 1998.03     | 2003.53   | GALI |
| 264.854     | 29.913      | -0.85                      | -0.68                      | 0.58                        | 11.75              | 1998.03     | 2009.77   | LKHU |
| 264.666     | 29.791      | -0.27                      | 1.05                       | 0.87                        | 7.55               | 2002.22     | 2009.77   | NETP |
| 264.134     | 50.259      | 0.97                       | 0.63                       | 0.69                        | 5.75               | 2004.03     | 2009.77   | DUBO |
| 262.941     | 27.838      | -0.40                      | -0.58                      | 0.50                        | 8.38               | 1998.03     | 2006.40   | ARPS |
| 258.022     | 54.726      | 2.35                       | 2.26                       | 0.48                        | 11.75              | 1998.03     | 2009.77   | FLIN |
| 255.985     | 30.681      | 1.38                       | 1.76                       | 0.56                        | 6.86               | 1998.06     | 2004.92   | MDO1 |
| 251.881     | 34.302      | 0.70                       | 0.55                       | 0.70                        | 11.75              | 1998.03     | 2009.77   | PIE1 |
| 250.656     | -27.125     | -0.92                      | -0.71                      | 0.77                        | 5.65               | 2004.12     | 2009.77   | ISPA |
| 245.707     | 50.871      | -0.20                      | 0.02                       | 0.58                        | 6.38               | 2003.39     | 2009.77   | PRDS |
| 245.519     | 62.481      | 7.04                       | 6.75                       | 0.55                        | 8.59               | 2001.19     | 2009.77   | YELL |
| 242.239     | 70.736      | 2.50                       | 2.88                       | 0.45                        | 8.11               | 2001.67     | 2009.77   | HOLM |
| 240.375     | 49.323      | 1.02                       | 1.17                       | 0.42                        | 11.75              | 1998.03     | 2009.77   | DRAO |
| 237.832     | 52.237      | 2.29                       | 2.28                       | 0.40                        | 11.75              | 1998.03     | 2009.77   | WILL |
| 236.513     | 48.390      | 2.25                       | 1.55                       | 0.91                        | 5.64               | 1998.03     | 2003.66   | ALBH |
| 224.778     | 60.751      | 2.37                       | 2.80                       | 0.60                        | 11.75              | 1998.03     | 2009.77   | WHIT |
| 210.394     | -17.577     | -0.25                      | -0.15                      | 0.43                        | 9.12               | 2000.65     | 2009.77   | TAH1 |
| 210.394     | -17.577     | -0.28                      | -0.25                      | 0.40                        | 11.35              | 1998.43     | 2009.77   | THTI |
| 204.947     | 19.719      | -1.51                      | -1.22                      | 0.43                        | 11.75              | 1998.03     | 2009.77   | HILO |
| 204.544     | 19.801      | -2.50                      | -2.45                      | 0.45                        | 11.75              | 1998.03     | 2009.77   | MKEA |
| 204.116     | 20.246      | -1.88                      | -1.05                      | 0.67                        | 10.01              | 1998.03     | 2008.03   | UPO1 |
| 203.743     | 20.707      | -0.92                      | -0.84                      | 0.36                        | 10.77              | 1999.00     | 2009.77   | MAUI |
| 202.135     | 21.303      | -0.26                      | 0.08                       | 0.35                        | 11.75              | 1998.03     | 2009.77   | HNLC |
| 200.661     | 21.985      | -0.46                      | -0.40                      | 0.86                        | 5.56               | 1999.00     | 2004.56   | HLUE |
| 200.335     | 22.126      | 0.09                       | 0.18                       | 0.77                        | 5.37               | 2004.41     | 2009.77   | KOKB |
| 200.242     | 21.983      | -0.46                      | -0.06                      | 0.43                        | 8.99               | 1998.03     | 2007.02   | KOK1 |
| 200.199     | -21.201     | -0.09                      | -0.13                      | 0.66                        | 8.07               | 2001.71     | 2009.77   | CKIS |
| 197.293     | 55.190      | 0.42                       | 0.47                       | 0.65                        | 9.64               | 1998.03     | 2007.67   | BAY1 |
| 189.278     | -14.326     | -2.64                      | -2.00                      | 0.94                        | 8.13               | 2001.63     | 2009.75   | ASPA |
| 188.262     | -13.849     | -1.78                      | -1.49                      | 0.73                        | 8.24               | 2001.51     | 2009.75   | SAMO |
| 188.000     | -13.832     | -1.71                      | -0.83                      | 0.55                        | 9.93               | 1998.03     | 2007.95   | FALE |
| 183.434     | -43.956     | -0.78                      | -0.90                      | 0.44                        | 6.96               | 1998.03     | 2004.98   | CHAT |
| 179.197     | -8.525      | -1.13                      | -0.66                      | 0.68                        | 7.40               | 2002.38     | 2009.77   | TUVA |
| 177.447     | -17.609     | -1.46                      | -1.14                      | 0.75                        | 7.86               | 2001.92     | 2009.77   | LAUT |
| 174.834     | -36.603     | -1.65                      | -1.45                      | 0.80                        | 6.96               | 1998.03     | 2004.98   | AUCK |
| 172.923     | 1.355       | -0.27                      | -0.53                      | 0.65                        | 7.19               | 2002.59     | 2009.77   | KIRI |
| 168.315     | -17.744     | -3.62                      | -3.40                      | 0.80                        | 7.07               | 2002.70     | 2009.77   | VANU |
| 166.926     | -0.552      | -1.03                      | -1.48                      | 0.68                        | 6.27               | 2003.51     | 2009.77   | NAUR |
| 166.669     | -77.838     | -1.41                      | -1.13                      | 0.59                        | 7.76               | 2002.01     | 2009.77   | MCM4 |
| 166.438     | 68.076      | 0.41                       | 0.53                       | 0.87                        | 5.10               | 2003.85     | 2008.95   | BILI |
| 166.410     | -22.270     | -2.65                      | -2.88                      | 0.58                        | 9.20               | 1998.03     | 2007.23   | NOUM |
| 164.287     | -20.559     | -1.93                      | -1.76                      | 0.41                        | 11.75              | 1998.03     | 2009.77   | KOUC |
| 158.210     | 6.960       | -0.47                      | -0.97                      | 0.69                        | 6.44               | 2003.34     | 2009.77   | POHN |
| 153.979     | 24.290      | -0.64                      | -0.55                      | 0.88                        | 6.42               | 2002.95     | 2009.37   | MCIL |
| 148.980     | -35.399     | -0.31                      | 0.64                       | 0.77                        | 6.96               | 1998.03     | 2004.98   | TID2 |
| 147.439     | -42.805     | -0.42                      | -0.13                      | 0.90                        | 6.96               | 1998.03     | 2004.98   | HOB2 |
| 147.056     | -19.269     | -0.72                      | -0.40                      | 0.46                        | 11.75              | 1998.03     | 2009.77   | TOW2 |
| 146.993     | -6.674      | -5.49                      | -4.83                      | 0.75                        | 5.54               | 2001.02     | 2006.55   | LAE1 |
| 144.868     | 13.589      | -0.36                      | 0.11                       | 0.64                        | 7.45               | 2002.32     | 2009.77   | GUAM |
| 144.803     | 13.433      | -0.63                      | -0.75                      | 0.69                        | 6.11               | 2003.66     | 2009.77   | GUUG |
| 142.717     | 47.030      | 0.35                       | 0.72                       | 0.70                        | 5.56               | 2003.74     | 2009.29   | YSSK |
| 140.658     | 35.955      | -0.99                      | -0.52                      | 0.64                        | 8.01               | 2001.76     | 2009.77   | KSMV |
| 140.087     | 36.106      | -0.79                      | 0.31                       | 0.55                        | 11.75              | 1998.03     | 2009.77   | TSKB |
| 139.488     | 35.710      | 0.25                       | 0.25                       | 0.53                        | 8.01               | 2001.76     | 2009.77   | KGNI |
| 138.362     | 36.133      | -3.21                      | -2.28                      | 0.76                        | 6.65               | 1998.03     | 2004.68   | USUD |
| 138.362     | 36.133      | -1.39                      | -1.59                      | 0.88                        | 5.08               | 2004.70     | 2009.77   | USUD |
| 135.046     | 48.521      | -0.57                      | 0.22                       | 0.61                        | 7.32               | 2002.45     | 2009.77   | KHAJ |
| 133.886     | -23.670     | 0.43                       | 0.18                       | 0.43                        | 11.75              | 1998.03     | 2009.77   | ALIC |
| 133.810     | -31.867     | -0.60                      | -0.87                      | 0.39                        | 11.65              | 1998.12     | 2009.77   | CEDU |
| 129.680     | 62.031      | 0.68                       | 0.07                       | 0.55                        | 9.45               | 1999.81     | 2009.26   | YAKT |
| 128.866     | 71.634      | 1.24                       | 1.39                       | 0.49                        | 10.52              | 1998.77     | 2009.29   | TIXI |
| 110.520     | -66.283     | 1.70                       | 1.33                       | 0.51                        | 11.75              | 1998.03     | 2009.77   | CASI |
| 107.052     | 47.865      | 1.12                       | 0.96                       | 0.45                        | 8.76               | 2001.02     | 2009.77   | ULAB |
| 104.316     | 52.219      | 1.17                       | 0.58                       | 0.46                        | 11.69              | 1998.03     | 2009.72   | IRKT |
| 104.316     | 52.219      | -0.92                      | -0.77                      | 0.47                        | 7.32               | 2002.45     | 2009.77   | IRKJ |
| 92.794      | 55.993      | 0.85                       | 0.79                       | 0.76                        | 6.52               | 1998.22     | 2004.73   | KSTU |
| 88.360      | 69.362      | 1.57                       | 1.58                       | 0.50                        | 8.57               | 2000.73     | 2009.29   | NRIL |
| 83.235      | 54.841      | 1.08                       | 1.26                       | 0.84                        | 6.02               | 2003.76     | 2009.77   | NVSK |
| 78.619      | 50.714      | 2.93                       | 2.79                       | 0.56                        | 8.74               | 2001.03     | 2009.77   | KRTV |

Tab. A.1 : — Continued from previous page

| Lon<br>(°E) | Lat<br>(°N) | 14-HPT Hgt Rate<br>(mm/yr) | 07-HPT Hgt Rate<br>(mm/yr) | 1- $\sigma$ Unc.<br>(mm/yr) | Data Span<br>(yrs) | Start Epoch | End Epoch | Site |
|-------------|-------------|----------------------------|----------------------------|-----------------------------|--------------------|-------------|-----------|------|
| 77.973      | -68.577     | -0.53                      | -0.71                      | 0.71                        | 8.16               | 2000.33     | 2008.49   | DAVR |
| 70.256      | -49.351     | 0.60                       | 0.09                       | 0.43                        | 11.75              | 1998.03     | 2009.77   | KERG |
| 62.871      | -67.605     | -0.13                      | -0.20                      | 0.32                        | 11.75              | 1998.03     | 2009.77   | MAW1 |
| 58.560      | 56.430      | 0.42                       | 0.80                       | 0.48                        | 9.20               | 2000.10     | 2009.29   | ARTU |
| 55.572      | -21.208     | -2.45                      | -1.90                      | 0.76                        | 10.77              | 1999.00     | 2009.77   | REUN |
| 50.608      | 26.209      | 0.22                       | -0.04                      | 0.40                        | 10.56              | 1998.03     | 2008.59   | BAHR |
| 44.503      | 40.226      | 1.49                       | 0.77                       | 0.37                        | 11.71              | 1998.03     | 2009.74   | NSSP |
| 41.565      | 43.788      | 1.18                       | 1.74                       | 0.65                        | 8.24               | 2001.53     | 2009.77   | ZECK |
| 40.194      | -2.996      | 0.19                       | -0.71                      | 0.68                        | 10.67              | 1998.03     | 2008.70   | MALI |
| 39.776      | 40.995      | 0.86                       | -0.03                      | 0.53                        | 7.97               | 1999.94     | 2007.92   | TRAB |
| 39.584      | -69.007     | 1.20                       | 0.93                       | 0.50                        | 11.75              | 1998.03     | 2009.77   | SYOG |
| 37.215      | 56.021      | 0.49                       | 0.83                       | 0.55                        | 7.32               | 2002.45     | 2009.77   | MDVJ |
| 35.771      | 33.182      | 0.48                       | 0.51                       | 0.42                        | 9.49               | 2000.29     | 2009.77   | ELRO |
| 35.145      | 33.023      | 0.10                       | 0.10                       | 0.58                        | 9.41               | 2000.36     | 2009.77   | KABR |
| 34.921      | 29.509      | -0.89                      | -0.82                      | 0.85                        | 7.19               | 1998.03     | 2005.21   | ELAT |
| 34.781      | 32.068      | 1.42                       | 0.93                       | 0.47                        | 11.75              | 1998.03     | 2009.77   | TELA |
| 34.543      | 49.603      | 0.29                       | 0.11                       | 0.58                        | 8.30               | 2001.48     | 2009.77   | POLV |
| 34.256      | 36.566      | 0.66                       | 1.31                       | 0.70                        | 9.06               | 2000.71     | 2009.77   | MERS |
| 33.991      | 44.413      | 0.58                       | 0.22                       | 0.64                        | 7.34               | 2002.03     | 2009.37   | CRAO |
| 33.396      | 35.141      | 0.65                       | 0.58                       | 0.52                        | 10.12              | 1999.66     | 2009.77   | NICO |
| 32.078      | -28.796     | 0.69                       | 0.62                       | 0.65                        | 8.49               | 2000.77     | 2009.26   | RBAY |
| 31.973      | 46.973      | 0.41                       | 0.63                       | 0.61                        | 7.32               | 2002.45     | 2009.77   | MIKL |
| 30.738      | -0.601      | 1.19                       | 0.82                       | 0.63                        | 8.22               | 2001.55     | 2009.77   | MBAR |
| 28.311      | -15.426     | 0.30                       | 1.22                       | 0.81                        | 5.98               | 2002.43     | 2008.41   | ZAMB |
| 28.224      | -25.746     | 0.46                       | 0.70                       | 0.58                        | 8.57               | 2000.00     | 2008.57   | S121 |
| 27.707      | -25.887     | 0.56                       | 0.49                       | 0.52                        | 9.16               | 2000.61     | 2009.77   | HARB |
| 27.687      | -25.890     | -0.08                      | -0.12                      | 0.44                        | 11.69              | 1998.08     | 2009.77   | HRAO |
| 24.395      | 60.217      | 5.14                       | 4.77                       | 0.33                        | 11.75              | 1998.03     | 2009.77   | METS |
| 24.059      | 56.949      | 1.71                       | 1.21                       | 0.39                        | 10.60              | 1999.18     | 2009.77   | RIGA |
| 23.395      | 42.556      | 0.48                       | 0.18                       | 0.40                        | 11.75              | 1998.03     | 2009.77   | SOFI |
| 21.771      | 62.961      | 9.21                       | 8.87                       | 0.36                        | 10.60              | 1999.18     | 2009.77   | VAAS |
| 21.032      | 52.098      | 0.76                       | 0.73                       | 0.95                        | 5.42               | 2002.80     | 2008.22   | JOZZ |
| 21.032      | 52.097      | 1.14                       | 0.99                       | 0.53                        | 6.92               | 1998.03     | 2004.94   | JOZE |
| 20.968      | 67.857      | 7.19                       | 7.41                       | 0.54                        | 11.75              | 1998.03     | 2009.77   | KIRU |
| 20.811      | -32.381     | 0.92                       | 1.07                       | 0.62                        | 7.59               | 2002.18     | 2009.77   | SUTM |
| 20.810      | -32.380     | 0.67                       | 0.47                       | 0.40                        | 11.48              | 1998.29     | 2009.77   | SUTH |
| 20.794      | 41.127      | -0.36                      | 0.17                       | 0.82                        | 7.34               | 2002.03     | 2009.37   | ORID |
| 20.670      | 53.892      | -0.45                      | 0.10                       | 0.85                        | 5.23               | 2000.77     | 2006.00   | LAMA |
| 20.670      | 53.892      | -0.14                      | -0.20                      | 0.56                        | 11.75              | 1998.03     | 2009.77   | LAMA |
| 18.940      | 69.663      | 1.41                       | 1.06                       | 0.62                        | 5.23               | 2004.54     | 2009.77   | TRO1 |
| 18.938      | 69.663      | 3.11                       | 3.19                       | 0.43                        | 11.15              | 1998.20     | 2009.35   | TROM |
| 18.440      | -34.188     | -0.02                      | 0.04                       | 0.59                        | 7.40               | 2001.61     | 2009.01   | SIMO |
| 18.110      | 42.650      | 0.91                       | 0.92                       | 0.60                        | 8.74               | 2001.03     | 2009.77   | DUBR |
| 17.259      | 60.595      | 7.99                       | 7.92                       | 0.39                        | 10.60              | 1999.18     | 2009.77   | MAR6 |
| 17.073      | 52.277      | 0.16                       | 0.04                       | 0.43                        | 10.35              | 1999.43     | 2009.77   | BOR1 |
| 17.062      | 51.113      | 1.17                       | 1.52                       | 0.84                        | 11.75              | 1998.03     | 2009.77   | WROC |
| 16.705      | 40.649      | 0.58                       | 1.05                       | 0.54                        | 8.39               | 2001.38     | 2009.77   | MAT1 |
| 16.704      | 40.649      | 0.94                       | 0.87                       | 0.42                        | 10.31              | 1999.46     | 2009.77   | MATE |
| 14.990      | 36.876      | -0.33                      | -0.17                      | 0.39                        | 9.06               | 2000.71     | 2009.77   | NOT1 |
| 13.552      | -1.632      | 3.67                       | 3.35                       | 0.82                        | 5.87               | 2001.40     | 2007.26   | MSKU |
| 13.066      | 52.379      | -0.54                      | 0.08                       | 0.47                        | 11.75              | 1998.03     | 2009.77   | POTS |
| 12.891      | 57.715      | 4.97                       | 5.38                       | 0.50                        | 8.09               | 2001.69     | 2009.77   | SPT0 |
| 12.879      | 49.144      | 0.36                       | 0.11                       | 0.41                        | 11.75              | 1998.03     | 2009.77   | WTZA |
| 12.879      | 49.144      | 0.03                       | 0.04                       | 0.40                        | 11.75              | 1998.03     | 2009.77   | WTZR |
| 12.606      | 35.500      | 0.63                       | 0.44                       | 0.40                        | 10.54              | 1999.23     | 2009.77   | LAMP |
| 11.926      | 57.395      | 3.37                       | 3.10                       | 0.31                        | 10.67              | 1999.10     | 2009.77   | ONSA |
| 11.865      | 78.930      | 7.44                       | 7.58                       | 0.67                        | 6.23               | 2003.55     | 2009.77   | NYA1 |
| 11.865      | 78.930      | 7.47                       | 7.62                       | 0.57                        | 6.02               | 2003.55     | 2009.56   | NYAL |
| 11.865      | 78.930      | 6.31                       | 6.06                       | 0.75                        | 5.35               | 1998.20     | 2003.55   | NYA1 |
| 11.647      | 44.520      | -0.73                      | -0.80                      | 0.47                        | 8.51               | 2001.26     | 2009.77   | MEDI |
| 11.280      | 48.086      | 1.40                       | 1.72                       | 0.64                        | 6.10               | 2001.86     | 2007.95   | OBE2 |
| 10.460      | 52.296      | 0.41                       | 0.06                       | 0.50                        | 6.09               | 2003.68     | 2009.77   | PTBB |
| 9.672       | 0.354       | 0.50                       | 1.00                       | 0.45                        | 9.52               | 2000.25     | 2009.77   | NKLG |
| 8.973       | 39.136      | 0.62                       | 0.72                       | 0.37                        | 8.24               | 2001.53     | 2009.77   | CAGL |
| 8.763       | 41.927      | 0.63                       | 0.60                       | 0.42                        | 7.97               | 2000.63     | 2008.61   | AJAC |
| 7.639       | 45.015      | 2.05                       | 1.36                       | 0.66                        | 5.81               | 2003.97     | 2009.77   | IENG |
| 7.465       | 46.877      | 1.64                       | 1.57                       | 0.38                        | 10.92              | 1998.85     | 2009.77   | ZIMM |
| 6.921       | 43.755      | 0.01                       | -0.20                      | 0.56                        | 5.29               | 1998.03     | 2003.32   | GRAS |
| 6.605       | 52.915      | 0.31                       | -0.21                      | 0.36                        | 11.75              | 1998.03     | 2009.77   | WSRT |
| 4.359       | 50.798      | 0.87                       | 1.06                       | 0.44                        | 9.45               | 2000.33     | 2009.77   | BRUS |
| 1.481       | 43.561      | 0.31                       | 0.60                       | 0.46                        | 8.76               | 2001.02     | 2009.77   | TLSE |
| 0.336       | 50.867      | 0.72                       | 0.59                       | 0.43                        | 8.09               | 2001.69     | 2009.77   | HERS |
